# Supplementary material
Source: PubMed Central journal article supplement (PMC7160020)
Supplement: NIHMS1067396-supplement-SI.pdf [file NIHMS1067396-supplement-SI.pdf]

## Supporting Information

### **Subunit Interaction Dynamics of the *E. coli* Class Ia Ribonucleotide Reductase: In Search of a Robust Assay**

Kanchana Ravichandran,<sup>a</sup> Lisa Olshansky,<sup>a,c</sup> Daniel G. Nocera,<sup>c</sup> JoAnne Stubbe<sup>a,b,\*</sup>

<sup>a</sup> Department of Chemistry and <sup>b</sup> Department of Biology, Massachusetts Institute of Technology, 77 Massachusetts Avenue, Cambridge, MA 02139. <sup>c</sup> Department of Chemistry and Chemical Biology, 12 Oxford St., Harvard University, Cambridge, MA 02138

stubbe@mit.edu

## Table of Contents

| <i>Index</i>                                                                       | <i>Page</i> |
|------------------------------------------------------------------------------------|-------------|
| <b>Figure S1.</b> dCDP formation for inactive variants of $\alpha_2$ and $\beta_2$ | 3           |
| <b>Figure S2.</b> Turnover kinetics in the presence of TR/TRR/NADPH                | 4           |
| <b>Figure S3.</b> Pre-steady state single turnover kinetics of dCDP formation      | 5           |
| <b>Figure S4.</b> RNR assays in the presence of optimized endogenous reductants    | 6           |

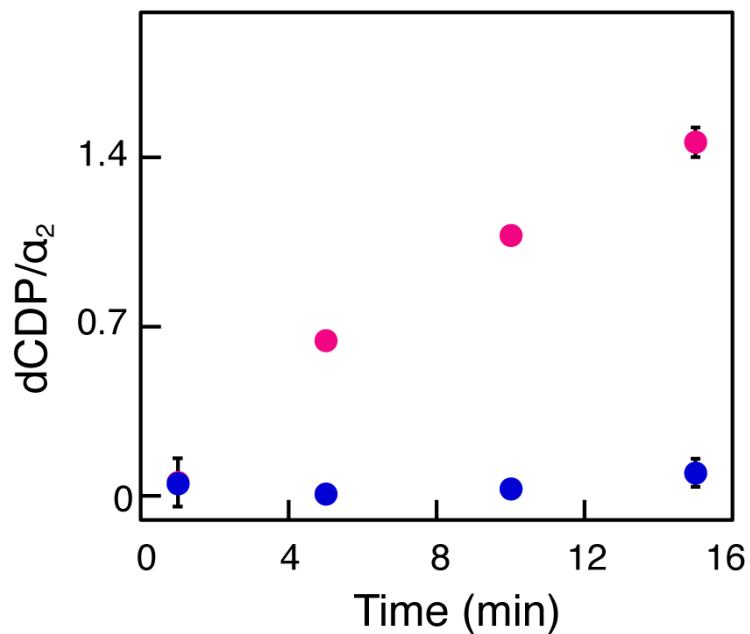

**Figure S1.** dCDP formation for inactive variants: Y<sub>356</sub>F- $\beta_2$  (●) and Y<sub>731</sub>F- $\alpha_2$  (●). Reactions contained in a total volume of 170  $\mu$ L, 2  $\mu$ M each of  $\alpha_2$  and  $\beta_2$  (or variants), 0.5 mM [5-<sup>3</sup>H]-CDP (7000 cpm/nmol), and 3 mM ATP in assay buffer.

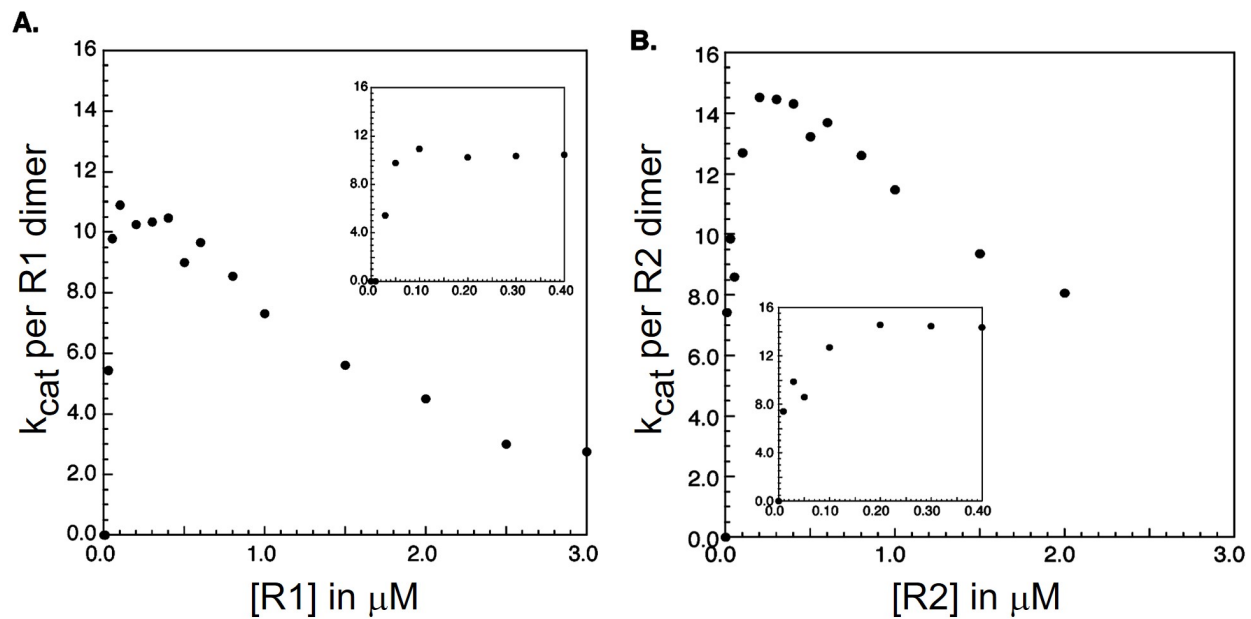

**Figure S2.** Turnover kinetics of *E. coli* RNR in the presence of TR/TRR/NADPH. Figure reproduced from reference 14 in the text.

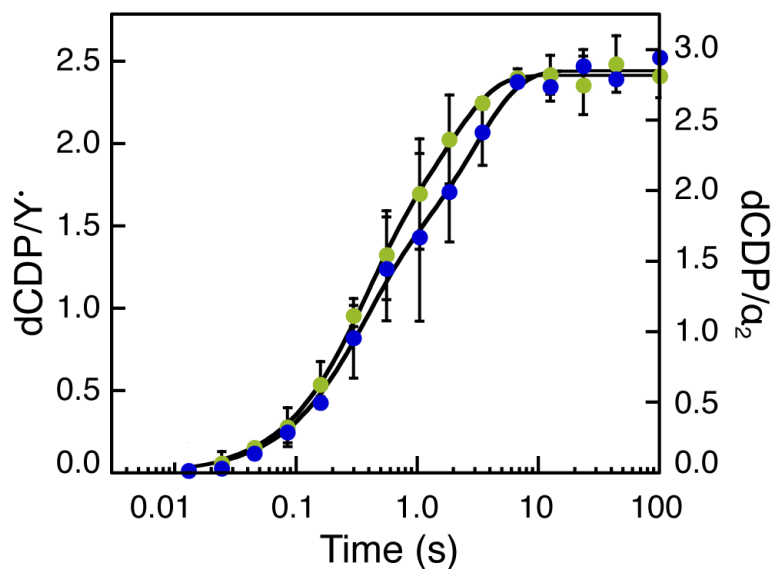

**Figure S3.** Pre-steady state single turnover kinetics of dCDP formation at 1:1  $\alpha_2:\beta_2$  with 1  $\mu\text{M}$  ( $\bullet$ ), and 10  $\mu\text{M}$  ( $\bullet$ ) of each subunit, respectively. Points and error bars represent the two independent trials. Traces represent fits to Eq. 1;  $y = A_1(1 - e^{-k_1 t}) + A_2(1 - e^{-k_2 t})$  and produced rate constants and amplitudes listed in Table 1 of the main text.

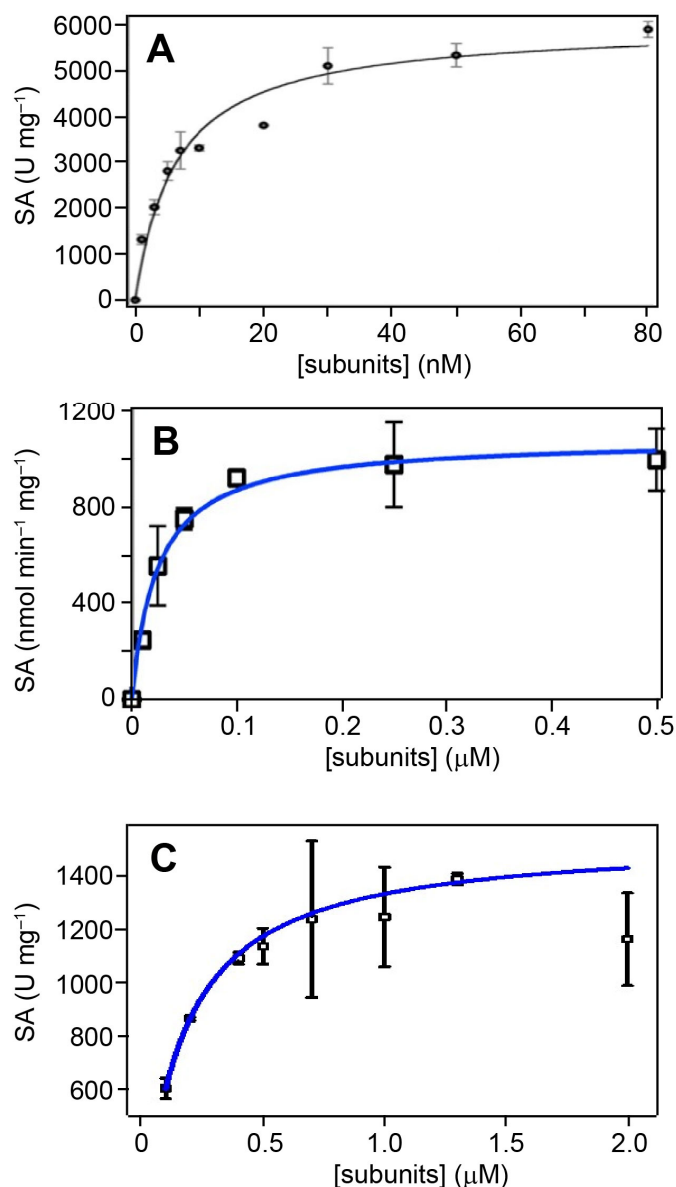

**Figure S4.** RNR assays in the presence of optimized endogenous reductant with  $\alpha:\beta$  (1:1) at increasing concentrations. (A) Activity assay of *S. sanguinis* NrdF and NrdE in the presence of 0.1 mM dATP, 10  $\mu$ M NrdH (endogenous reductant), and 20 mM DTT.  $V_{max}$  = 6000 nmol min<sup>-1</sup> mg<sup>-1</sup> and  $K_m$  = 6.4 nM. Figure reproduced from reference 46. (B) Activity assay of *B. subtilis* NrdF2 and full length NrdE in the presence of 1 mM CDP, 3 mM ATP, and optimized concentrations of TrxA/TrxB/NADPH.  $V_{max}$  = 1081 ± 36 nmol min<sup>-1</sup> mg<sup>-1</sup> and  $K_m$  = 0.025 ± 0.003  $\mu$ M. Figure reproduced from reference 47. (C) Activity assay of *M. tuberculosis* NrdF2 and NrdE using a 1:1 ratio of subunits, 1 mM CDP, 3 mM ATP 3  $\mu$ M NrdH and 20 mM DTT in 50 mM Hepes pH 7.6, 15 mM MgSO<sub>4</sub> and 1 mM EDTA at 37°C. The error bars are for two measurements. The  $V_{max}$  = 1545 nmol min<sup>-1</sup> mg<sup>-1</sup> and  $K_m$  = 0.10  $\mu$ M. When the enzyme was assayed in the presence of a five-fold excess of NrdF2, the activity increased to 2300 nmol min<sup>-1</sup> mg<sup>-1</sup>.
